# Supplementary material
Source: Springer Nature journal article supplement (https://www.springermedizin.de/resource/supplementary/13014_2013_1022_MOESM3_ESM.pdf/9635108)

**% of Health Professionals**

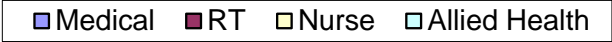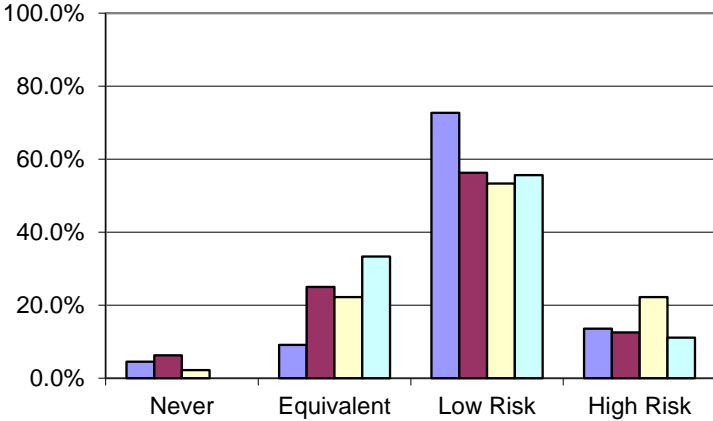

**Acceptable Risk Level**

Supplement: MOESM3 [file 9635108]
